# Supplementary material for: Vanillin prevents the growth of endometriotic lesions through anti-inflammatory and antioxidant pathways in a mouse model
Source: Royal Society of Chemistry journal article supplement (doi:10.1039/d3fo00750b), 2023-01-01
Supplement: d3fo00750b1.pdf [file d3fo00750b1.pdf]

**Vanillin Prevents the Growth of Endometriotic Lesions through Anti-inflammatory and Antioxidant Pathways in Mouse Model**

Ying-Nan Liu<sup>1</sup>, Jin-Wen Kang<sup>1</sup>, Yu Zhang<sup>1</sup>, Shan-Shan Song<sup>1</sup>, Qi-Xin Xu<sup>1</sup>, Han Zhang<sup>1</sup>, Lei-Lu<sup>1</sup>,  
Shu-Wen Wei<sup>1</sup>, Chen Liang<sup>1</sup>, Ren-Wei Su<sup>1,\*</sup>

<sup>1</sup>*College of Veterinary Medicine, South China Agricultural University, Guangzhou, Guangdong, China*

**\*Correspondence**

**Ren-Wei Su, 483 Wushan Road, Guangzhou, Guangdong 510642, China.**

**E-mail: [renweisu@scau.edu.cn](mailto:renweisu@scau.edu.cn)**

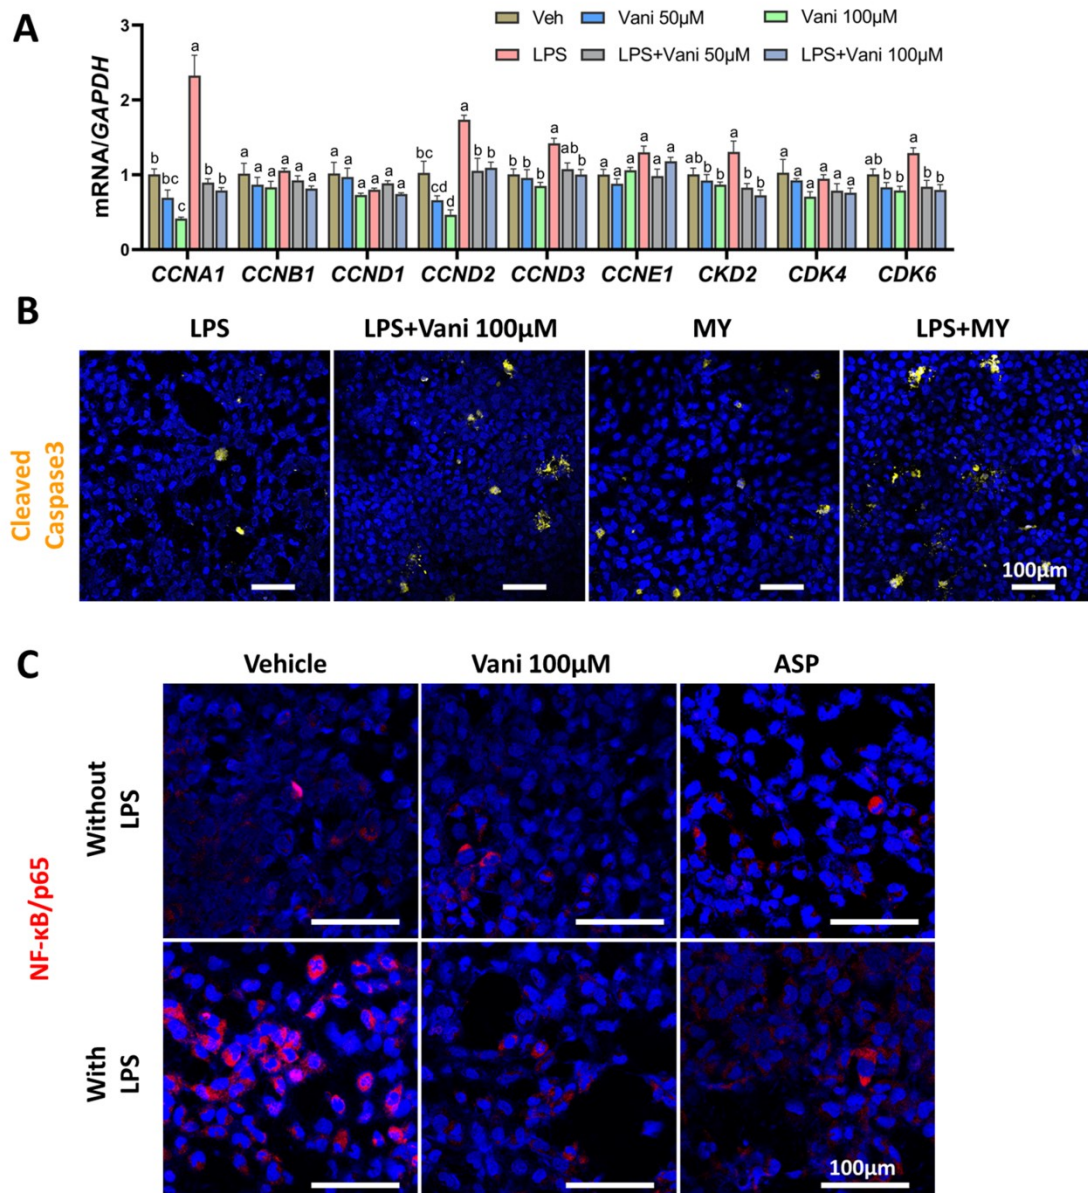

1  
 2 **Figure S1.** (A) The mRNA expression of cyclins and cyclins dependent kinases in 11Z cells after  
 3 LPS and Vanillin treatment. (B) The Immunofluorescence of Cleaved Caspase3 in 11Z, bar = 100  
 4 μm.. (C) The Immunofluorescence of NF-κB/p65 in 11Z, bar = 100 μm.. Data are from at least  
 5 three independent experiments. Veh, vehicle (0.1% DMSO); Vani, vanillin; LPS,  
 6 lipopolysaccharide; ASP, aspirin 100 μM; MY, myricetin 50 μM. Significant difference among  
 7 groups is displayed as different letters ( $p < 0.05$ ).

8

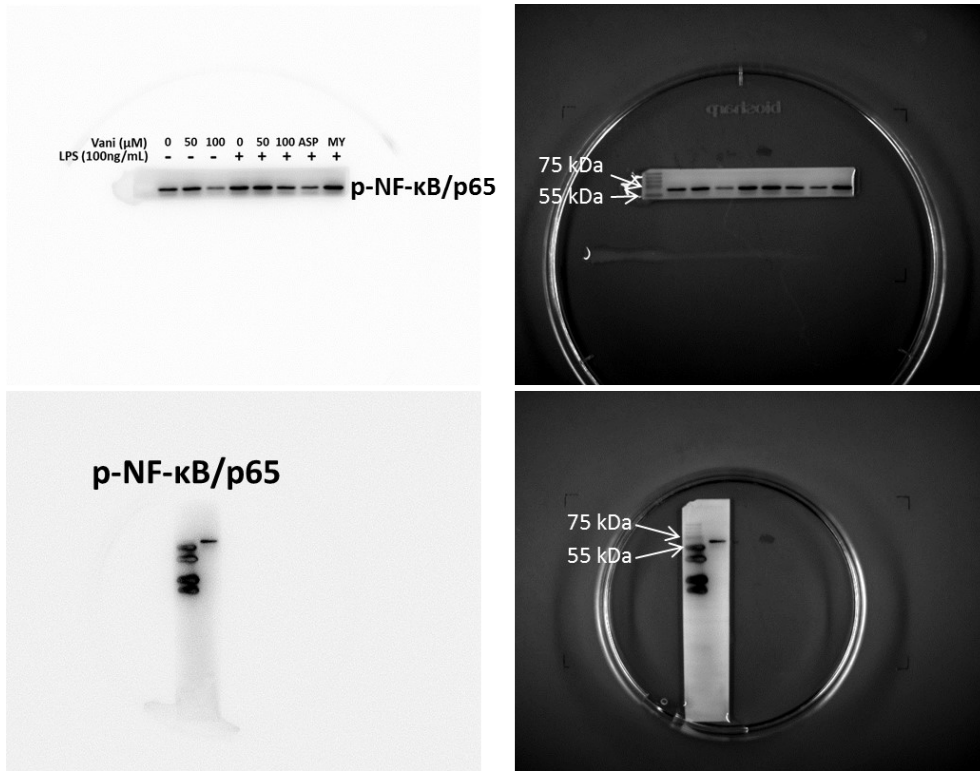

9  
10

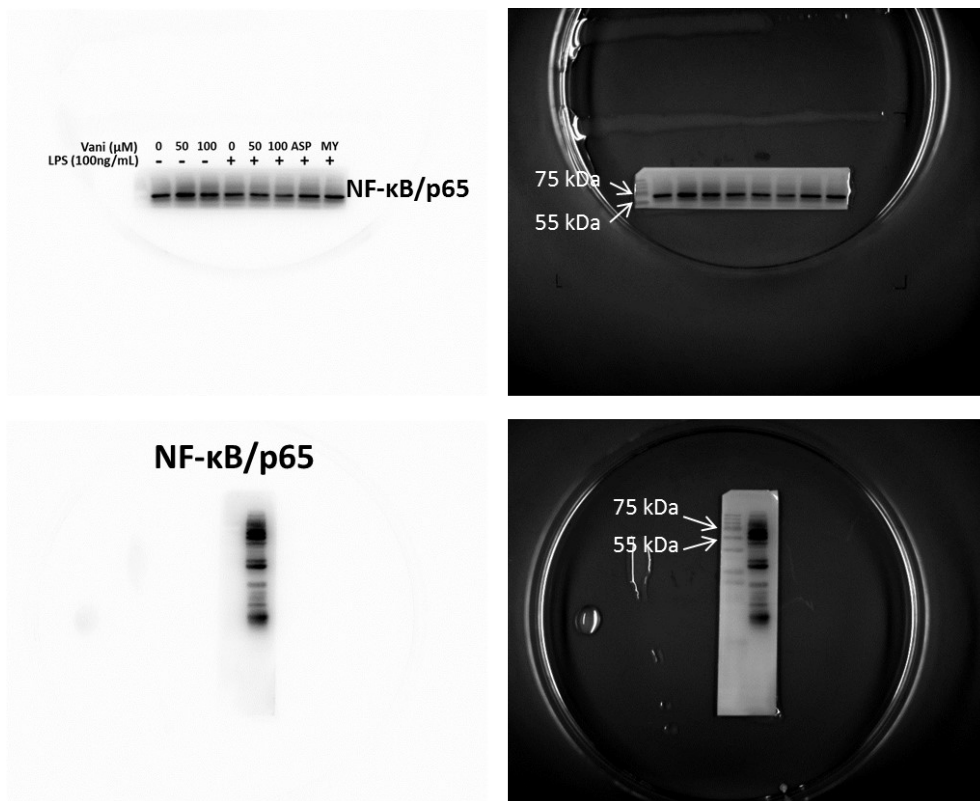

11

12 **Figure S2. The native image of western blot of p65 and p-p65.**

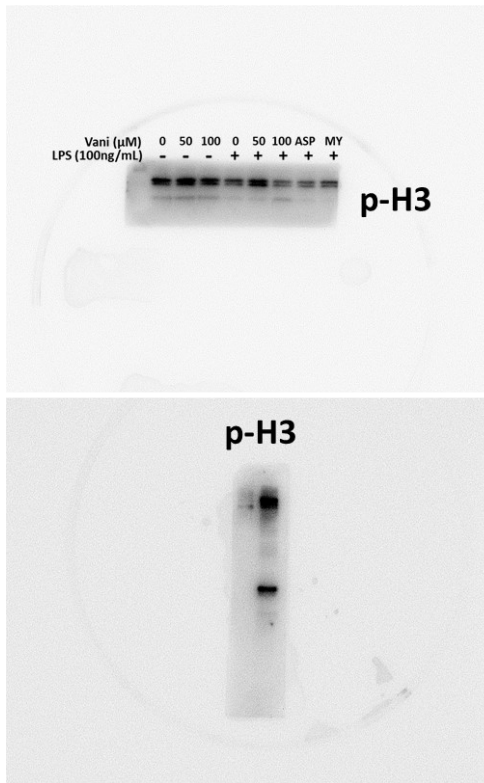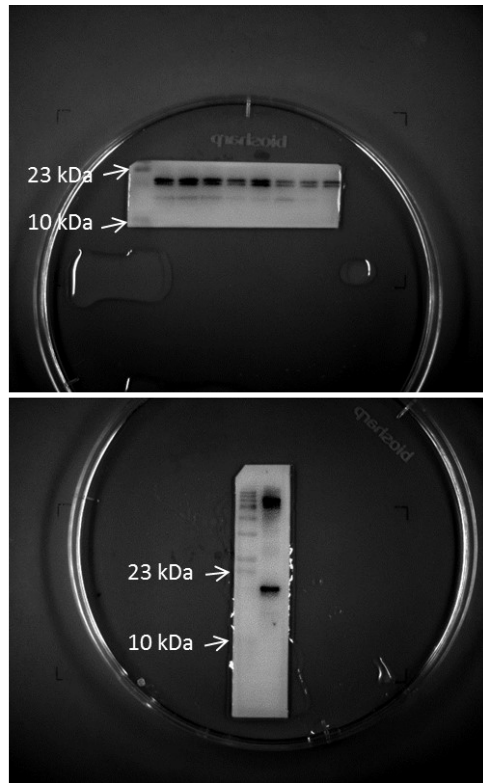

13  
14

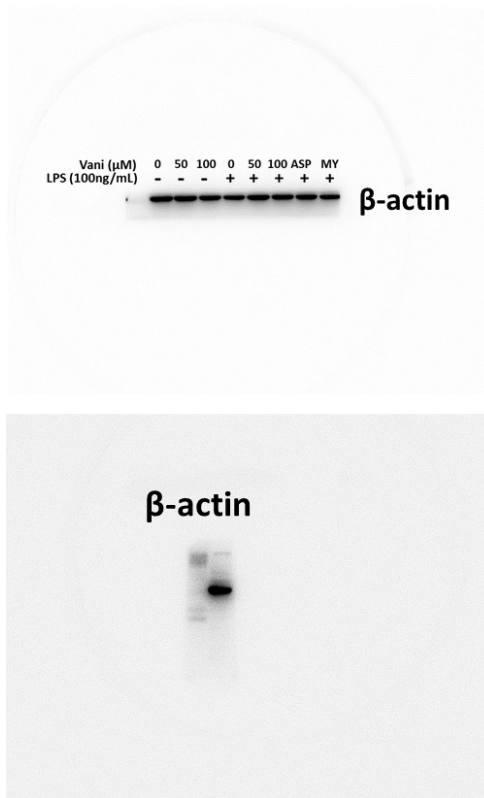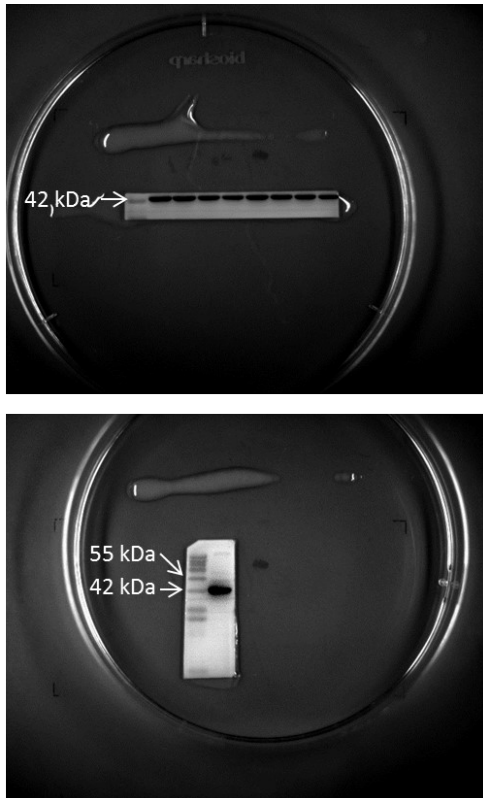

15

16 **Figure S3. The native image of western blot of p-H3 and  $\beta$ -actin.**

Table S1. Primary antibodies.

| Antibodies            | Company                   | Application                  |
|-----------------------|---------------------------|------------------------------|
| Anit-Ki67             | Axl-bio                   | IHC&IF (1:800)               |
| Anit-Cleaved Caspase3 | Cell Signaling Technology | IHC&IF (1:300)               |
| Anti-F4/80            | Abcam                     | IF (1:200)                   |
| Anti-Ly6G             | Santa Cruz                | IF (1:200)                   |
| Anit-Tom20            | Cell Signaling Technology | IHC (1:1000)                 |
| Anit-COX IV           | Cell Signaling Technology | IHC (1:100)                  |
| Anit-NF-kappaB /p65   | Cell Signaling Technology | IHC&IF (1:600)<br>WB(1:1000) |
| Anit-p-NF-kappaB /p65 | Cell Signaling Technology | WB(1:1000)                   |
| Anti- $\beta$ -actin  | Cell Signaling Technology | WB(1:1000)                   |
| Anti-p-H3             | Abcam                     | WB(1:5000)                   |
| Anit-ER $\alpha$      | Abcam                     | IHC (1:5000)                 |
| Anit-PGR              | Invitrogen                | IHC (1:200)                  |

IHC, immunohistochemistry; IF, immunofluorescence; WB, Western blot.

Table S2. Primer list for qPCR

| Gene Symbol         | Primer sequence (5' - 3')                                 |
|---------------------|-----------------------------------------------------------|
| <i>Mouse Rpl19</i>  | F:TCATGGAGCACATCCACAAGCTGA<br>R: CGCTTTCGTGCTTCCTTGGTCTTA |
| <i>Mouse Esr1</i>   | F: GGAAGCTCCTGTTTGCTCCT<br>R: AACCGACTTGACGTAGCCAG        |
| <i>Mouse Esr2</i>   | F: AGTGCGTGGAAGGGATTCTG<br>R: GTCAGCTTCCGGCTACTCTC        |
| <i>Mouse Ltf</i>    | F: CAGCAGGATGTGATAGCCACAA<br>R: CACTGATCACACTTGCGCTTCT    |
| <i>Mouse Muc1</i>   | F: TTCCAACCCAGGACACCTAC<br>R: ATTACCTGCCGAAACCTCCT        |
| <i>Mouse Muc4</i>   | F: AATGTTCTGCCTATACTGCC<br>R: TTGTATGGTTCCTGGGTCAC        |
| <i>Mouse Pgr</i>    | F: GTGGAAAAGCTATGTGCGCC<br>R: CAGTGGGGTTCAGGACCTTC        |
| <i>Mouse Ihh</i>    | F: CCCAACTACAATCCCGACATC<br>R: TCACCCGCAGTTTCACAC         |
| <i>Mouse Hoxa10</i> | F: GAAAACAGTAAAGCTTCGCCG<br>R: GAAACTCCTTCTCCAGCTCC       |
| <i>Mouse Areg</i>   | F: AGATACATCGAGAACCTGGAGG<br>R: AGAGACAAAGATAGTGACAGCTAC  |
| <i>Mouse Hand2</i>  | F: TCGCCTACCTCATGGATCTGCT<br>R: TCTTGTCGTTGCTGCTCACTGT    |
| <i>Mouse Tnfa</i>   | F: AGGCACTCCCCAAAAGATG<br>R: TGAGGGTCTGGGCCATAGAA         |
| <i>Mouse Ifng</i>   | F: AGGAACTGGCAAAAAGGATGGT<br>R: GTTGCTGATGGCCTGATTGT      |

|                     |                                                          |
|---------------------|----------------------------------------------------------|
| <i>Mouse Il6</i>    | F: TCTTGGGACTGATGCTGGTGACA<br>R: AGCCTCCGACTTGTGAAGTGGTA |
| <i>Mouse Il1b</i>   | F: TGGTGTGTGACGTTCCCATT<br>R: GCCCAAGGCCACAGGTATTT       |
| <i>Mouse Ki67</i>   | F: CCAGCTGCCTGTAGTGTCAA<br>R: CCATGTCTCAGCCTCACAGG       |
| <i>Mouse Bad</i>    | F: CTTGAGGAAGTCCGATCCCG<br>R: GCTCACTCGGCTCAAACCTCT      |
| <i>Mouse Bcl2</i>   | F: TCGTCGCTACCGTCGTGACTT<br>R: TGAAGAGTTCCTCCACCACCGT    |
| <i>Mouse Sod1</i>   | F: ATGGCGATGAAAGCGGTGTG<br>R: TTGCCTTCTGCTCGAAGTGG       |
| <i>Mouse Sod2</i>   | F: ACGTGAACAATCTCAACGCC<br>R: TCCTTTGGGTTCTCCACCAC       |
| <i>Mouse Gpx1</i>   | F: ACACCAGGAGAATGGCAAGAA<br>R: TCCGCAGGAAGGTAAAGAGC      |
| <i>Mouse Nlrp3</i>  | F: TATCCACTGCCGAGAGGTGA<br>R: TCTTGACACTGGTGGGTTT        |
| <i>Mouse Prl8a2</i> | F: AACCTCACTTCTCAGGGGCA<br>R: GAGCAGCCATTCTCTCCTGTT      |
| <i>Mouse Prl3c1</i> | F: ATTGACTCAAGCACGCACCT<br>R: GTGACGAGAAGAGGAAAGCAGA     |
| <i>Mouse Bmp2</i>   | F: ACACAGGGACACACCAACCAT<br>R: TGTGACCAGCTGTGTTTCATCTTG  |
| <i>Mouse Wnt4</i>   | F: TCGTCTTCGCCGTGTTCT<br>R: CTGCACCTGCCTCTGGAT           |
| <i>Human GAPDH</i>  | F: GAAGGTGAAGGTCGGAGT<br>R: GATGGCAACAATATCCACTT         |

|                    |                                                        |
|--------------------|--------------------------------------------------------|
| <i>Human IL6</i>   | F: CCTTCGGTCCAGTTGCCTTCT<br>R: TTGGGTCAGGGGTGGTTATTG   |
| <i>Human IL1B</i>  | F: AGCTCGCCAGTGAAATGATG<br>R: CTTGCTGTAGTGGTGGTCGG     |
| <i>Human TNFA</i>  | F: CATCGCCGTCTCCTACCA<br>R: AGTCGGTCACCCTTCTCC         |
| <i>Human TLR4</i>  | F: CATTGGTGTGTCGGTCCTCA<br>R: GGGTCTTCTCCACCTTCTGC     |
| <i>Human BCL2</i>  | F: CTTTGAGTTCGGTGGGGTCA<br>R: GAAATCAAACAGAGGCCGCA     |
| <i>Human BAX</i>   | F: TCATGGGCTGGACATTGGAC<br>R:GCGTCCCAAAGTAGGAGAGG      |
| <i>Human NLRP3</i> | F: GGGACCCAGGGATGAGAGTGTT<br>R: TGCTGCTGAGGACCAAGGAGAT |
| <i>Human CCNA1</i> | F: GGGCTCCCAGATTTTCGTCTT<br>R: CTGTAGCCAGCACAACTCCA    |
| <i>Human CCNB1</i> | F: GCACTTCCTTCGGAGAGCAT<br>R: TGTTCCTTGACAGTCCATTCACCA |
| <i>Human CCND1</i> | F: CAGATCATCCGCAAACACGC<br>R: AAGTTGTTGGGGCTCCTCAG     |
| <i>Human CCND2</i> | F: AGAAGCTGTCTCTGATCCGC<br>R: GCTCAGTCAGGGCATCACAA     |
| <i>Human CCND3</i> | F: TGCACATGATTTCTGGCCT<br>R: CTGTAGCACAGAGGGCCAAA      |
| <i>Human CCNE1</i> | F: AGAGGAAGGCAAACGTGACC<br>R: TATTGTCCCAAGGCTGGCTC     |
| <i>Human CDK2</i>  | F: GACACGCTGCTGGATGTCA<br>R: CAGAAAGCTAGGCCCTGGAG      |



|                   |                                                    |
|-------------------|----------------------------------------------------|
| <i>Human CDK4</i> | F: TTGTGGCCCTCAAGAGTGTG<br>R: ACCTTGATCTCCCGGTCAGT |
| <i>Human CDK6</i> | F: ACAGAGCACCCGAAGTCTTG<br>R: CTGGGAGTCCAATCACGTCC |
